# Supplementary material
Source: publisher figshare collection journal article supplement (https://gsapubs.figshare.com/articles/dataset/_/12530804)
Supplement: Supplementary file 1 [file 1]

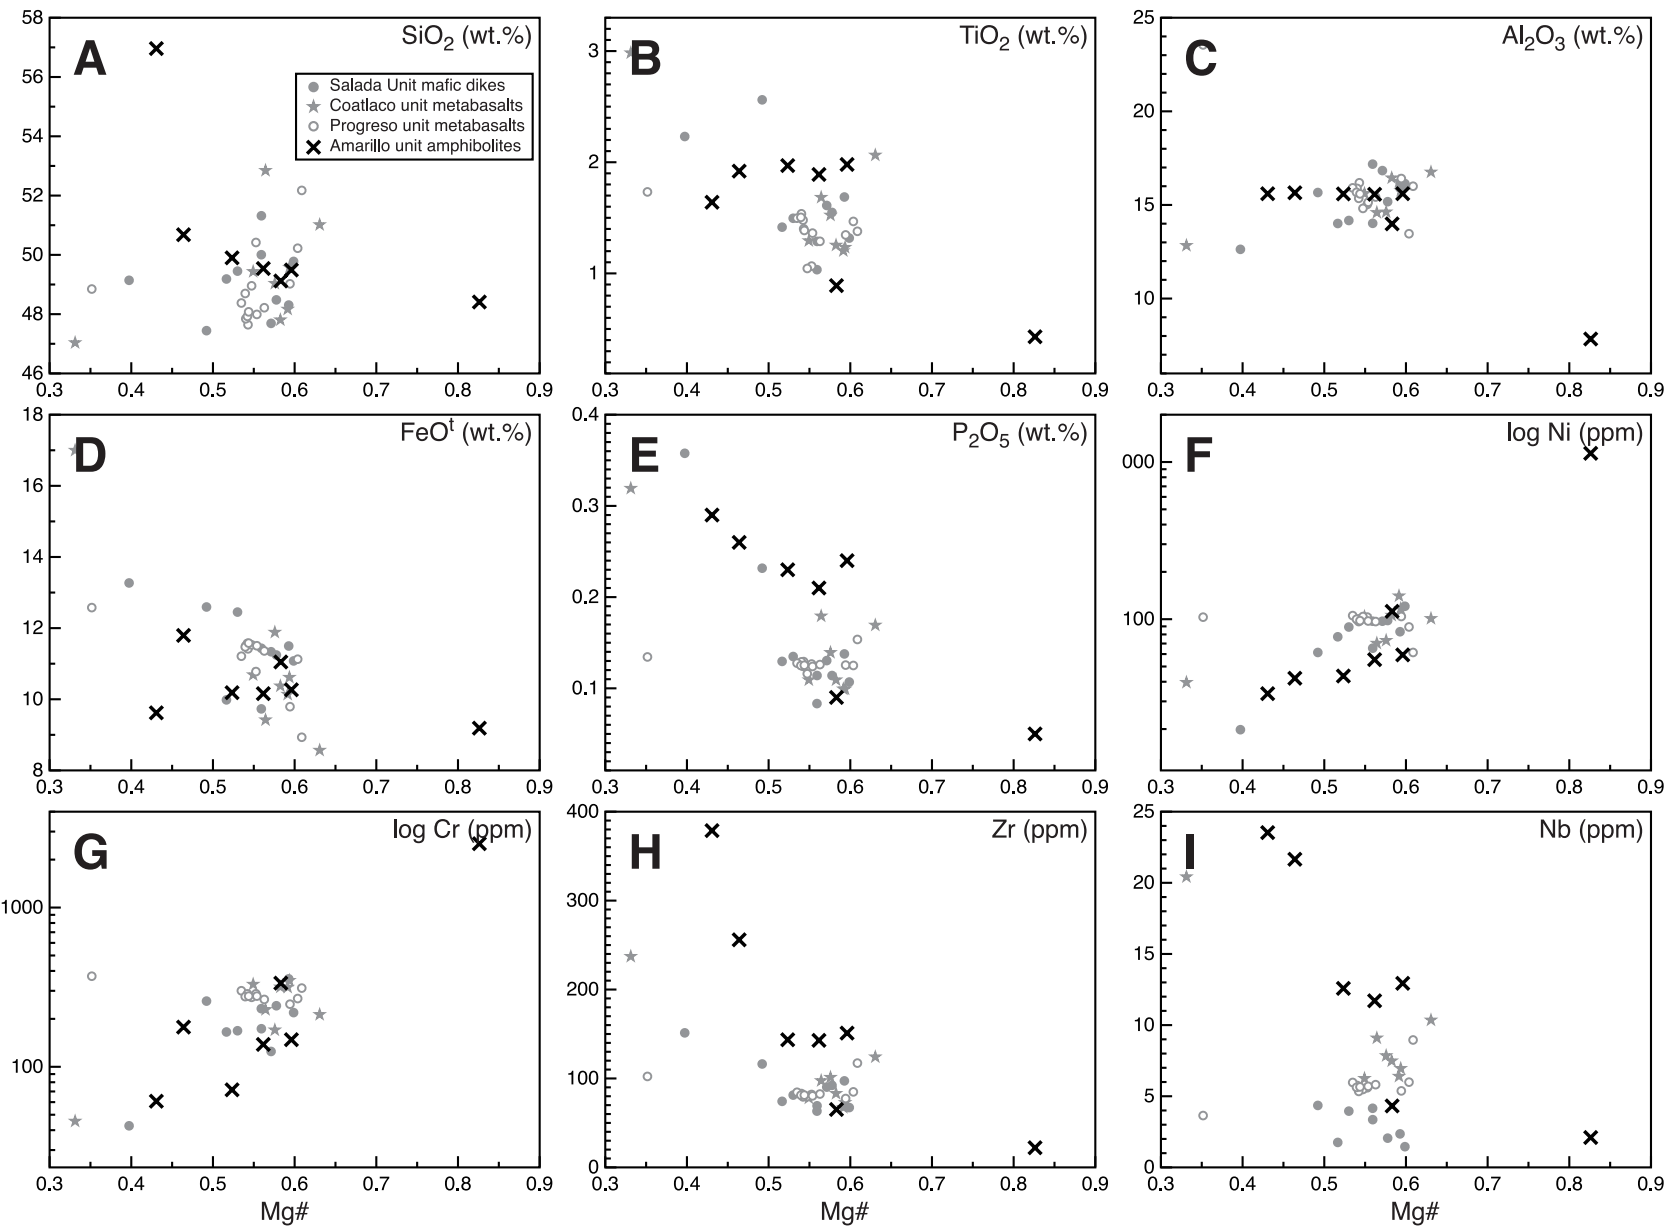

Figure DR-1. Selected Harker diagrams for amphibolites of the Amarillo unit. Geochemical data of Salada Unit mafic dikes (from Morales-Gómez et al., 2009), and metabasalts from the Coatlaco unit (Grodzicki et al., 2008) and Progreso unit (Ortega-Obregón et al., 2010) are included for comparison.

## REFERENCES CITED

- Grodzicki, K.R., Nance, R.D., Keppie, J.D., Dostal, J., and Murphy, J.B., 2008, Structural, geochemical and geochronological analysis of metasedimentary and metavolcanic rocks of the Coatlaco area, Acatlán Complex, southern Mexico: *Tectonophysics*, v. 461, no. 1–4, p. 311–323, doi:10.1016/j.tecto.2008.01.016.
- Morales-Gómez, M., Keppie, J.D., and Dostal, J., 2009, Carboniferous tholeiitic dikes in the Salada unit, Acatlán Complex, southern Mexico: a record of extension on the western margin of Pangea: *Revista Mexicana de Ciencias Geológicas*, v. 26, no. 1, p. 133–142.
- Ortega-Obregón, C., Keppie, J.D., and Murphy, J.B., 2010, Geochemistry of Carboniferous low metamorphic grade sedimentary and tholeiitic igneous rocks in the western Acatlán Complex, southern Mexico: deposition along the active western margin of Pangea: *Revista Mexicana de Ciencias Geológicas*, v. 27, no. 2, p. 238–253.
